# Supplementary material for: Eignung des Manchester Triage System zur Weiterleitung nichttraumatologischer Notfallpatienten mit geringer Fallschwere in die kassenärztliche Notfallversorgung: Ergebnisse einer holistischen Kohortenstudie
Source: Springer Nature journal article supplement (doi:10.1007/s10049-023-01277-z), 2024-01-08
Supplement: MOESM1 [file 26608332]

Zusatzmaterial zum Beitrag „Eignung des Manchester Triage Systems zur Weiterleitung nicht-traumatologischer Notfallpatienten mit geringer Fallschwere in die kassenärztliche Notfallversorgung: Ergebnisse einer holistischen Kohortenstudie“ von Rovas A, Korf L, Finke M et al. (2023) in *Notfall+Rettenungsmedizin*

Beitrag und Zusatzmaterial stehen Ihnen auf [www.springermedizin.de](http://www.springermedizin.de) zur Verfügung. Bitte geben Sie dort den Beitragstitel in die Suche ein.

### Supplement Tabelle Baseline-Charakteristika nach MTS Kategorie

|                                                          | Total      | MTS 4      | MTS 5      | p-Wert |
|----------------------------------------------------------|------------|------------|------------|--------|
| Gesamtanzahl %                                           | 261        | 214        | 47         | -      |
| Alter (in Jahren), median (IQR)                          | 39 (28-57) | 39 (28-57) | 39 (29-61) | 0,72   |
| Geschlecht weiblich, n (%)                               | 142 (54,4) | 118 (55,1) | 24 (51,1)  | 0,64   |
| Außerhalb Hausarzt-/<br>Notfallpraxisöffnungszeit, n (%) | 220 (84,3) | 175 (79,2) | 45 (95,7)  | 0,06   |
| qSOFA Score, median (IQR)                                | 0 (0-0)    | 0 (0-0)    | 0 (0-0)    | 0,47   |
| Charlson Comorbidity Index, median<br>(IQR)              | 0 (0-1)    | 0 (0-1)    | 0 (0-0)    | 0,50   |
| Komorbiditäten, n (%)                                    |            |            |            |        |
| Lungenerkrankung                                         | 20 (7,6)   | 17 (7,9)   | 3 (6,4)    | 0,78   |
| Niereninsuffizienz                                       | 21 (8,0)   | 18 (8,4)   | 3 (6,4)    | 0,77   |
| Diabetes mellitus                                        | 13 (5,0)   | 12 (5,6)   | 1 (2,1)    | 0,47   |
| Herzinsuffizienz                                         | 30 (11,5)  | 27 (12,6)  | 3 (6,4)    | 0,31   |
| Spezielle Notfalldiagnostik, n (%)                       |            |            |            |        |
| CT                                                       | 21 (8,1)   | 20 (9,3)   | 1 (2,1)    | 0,14   |
| MRT                                                      | 37 (14,2)  | 33 (15,4)  | 4 (8,5)    | 0,25   |
| Lumbalpunktion                                           | 12 (4,6)   | 11 (5,1)   | 1 (2,1)    | 0,70   |
| Endoskopie                                               | 3 (1,2)    | 2 (0,9)    | 1 (2,1)    | 0,46   |
| Weitere Diagnostik, n (%)                                |            |            |            |        |
| Roentgen                                                 | 30 (11,5)  | 25 (11,7)  | 5 (10,6)   | 1      |
| Echokardiographie                                        | 18 (6,9)   | 15 (7)     | 3 (6,4)    | 1      |
| Sonographie                                              | 86 (33)    | 72 (33,6)  | 14 (29,8)  | 0,61   |
| Symptome & Beschwerden, n (%)                            |            |            |            | 0,01   |

|                             |           |           |           |      |
|-----------------------------|-----------|-----------|-----------|------|
| abdominelle Schmerzen       | 29 (11,1) | 25 (11,7) | 4 (8,5)   |      |
| Allergie                    | 1 (0,4)   | 1 (0,5)   | 0 (0)     |      |
| Augenprobleme               | 7 (2,7)   | 4 (1,9)   | 3 (6,4)   |      |
| Atemnot                     | 10 (3,8)  | 9 (4,2)   | 1 (2,1)   |      |
| Auffälliges Verhalten       | 14 (5,4)  | 14 (6,5)  | 0 (0)     |      |
| Durchfälle und Erbrechen    | 4 (1,5)   | 4 (1,9)   | 0 (0)     |      |
| Extremitätenprobleme        | 19 (7,3)  | 13 (6,1)  | 6 (12,8)  |      |
| Gesichtsprobleme            | 9 (3,4)   | 8 (3,7)   | 1 (2,1)   |      |
| Halsschmerzen               | 3 (1,1)   | 3 (1,4)   | 0 (0)     |      |
| Hautausschläge              | 3 (1,1)   | 1 (0,5)   | 2 (4,3)   |      |
| Herzklopfen                 | 6 (2,3)   | 5 (2,3)   | 1 (2,1)   |      |
| Hodenschmerz                | 2 (0,8)   | 2 (0,9)   | 0 (0)     |      |
| Kollabierter Erwachsener    | 2 (0,8)   | 2 (0,9)   | 0 (0)     |      |
| Kopfschmerz                 | 17 (6,5)  | 16 (7,5)  | 1 (2,1)   |      |
| Kopfverletzung              | 1 (0,4)   | 1 (0,5)   | 0 (0)     |      |
| Rückenschmerz               | 8 (3,1)   | 5 (2,3)   | 3 (6,4)   |      |
| Schwangerschaftsproblem     | 6 (2,3)   | 4 (1,9)   | 2 (4,3)   |      |
| Vaginale Blutung            | 5 (1,9)   | 4 (1,9)   | 1 (2,1)   |      |
| Sexuell erworbene Infektion | 3 (1,1)   | 0 (0)     | 3 (6,4)   |      |
| Thoraxschmerz               | 4 (1,5)   | 4 (1,9)   | 0 (0)     |      |
| Unwohlsein                  | 55 (21,1) | 43 (20,1) | 12 (25,5) |      |
| Urologische Probleme        | 21 (8,0)  | 19 (8,9)  | 2 (4,3)   |      |
| Zahnprobleme                | 16 (6,1)  | 15 (7)    | 1 (2,1)   |      |
| Generelle Indikatoren       | 16 (6,1)  | 12 (5,6)  | 4 (8,5)   |      |
| MTS-Gruppe                  |           |           |           |      |
| Grün - 4                    | 214 (82)  | 214 (100) | 0 (0)     |      |
| Blau - 5                    | 47 (18)   | 0 (0)     | 47 (100)  |      |
| Stationäre Aufnahme         | 67 (25,7) | 59 (27,6) | 8 (17)    | 0,14 |
| Intensivaufnahme            | 2 (0,8)   | 2 (0,9)   | 0 (0)     | 1    |
| Krankenhaussterblichkeit    | 2 (0,8)   | 2 (0,9)   | 0 (0)     | 1    |
